# Supplementary material for: Low-Copy Genes in Terpenoid Metabolism: The Evolution and Expression of MVK and DXR Genes in Angiosperms
Source: MDPI journal article supplement (doi:10.3390/plants9040525), 2020-04-19
Supplement: s1 [file s1]

Supplementary Materials

Supplementary Table 1. Primer sequences used for RT-qPCR analyses

| Gene ID | Primer sequence          | Size (bases) | Tm (°C) | Amplicon (bp) | Efficiency |
|---------|--------------------------|--------------|---------|---------------|------------|
| CaMVK   | F: ATGTTCCCTCCGCTTCC     | 18           | 59,3    | 95            | 97%        |
|         | R: TCCAACCGGCAAGAAAAT    | 19           | 59,1    |               |            |
| CaDXR   | F: CCTGTTCTCCCCTACGACT   | 19           | 59,3    | 127           | 92%        |
|         | R: GCCTCCATTGTCCTTCCT    | 18           | 59,1    |               |            |
| CaGAPDH | F: AGGCTGTTGGGAAAGTTCTTC | 21           | 59,5    | 70            | 98%        |
|         | R: ACTGTTGGAACTCGGAATGC  | 20           | 58.4    |               |            |

## Supplementary Figures

### MVK - Eudicotyledons

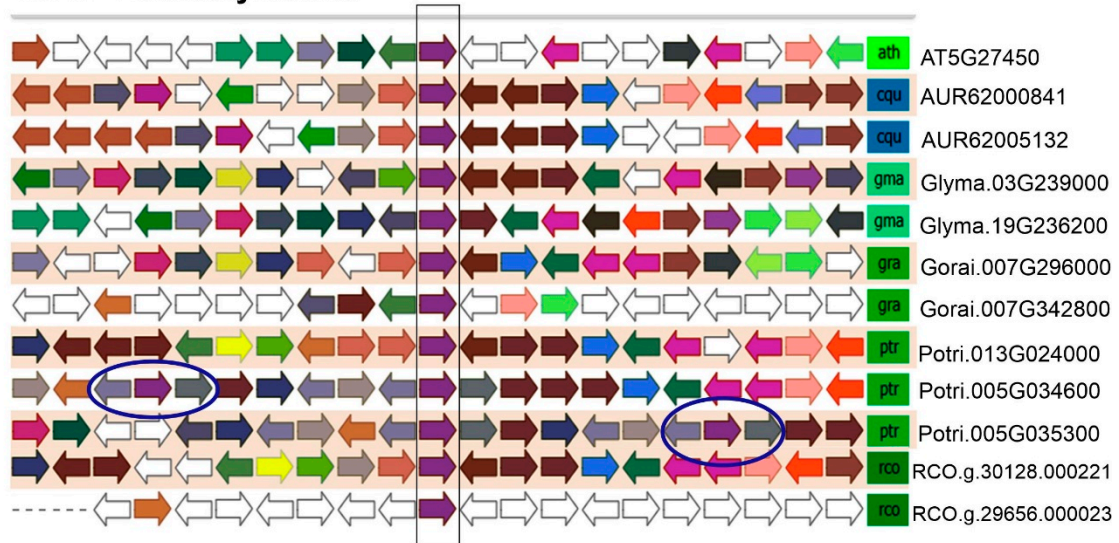

### MVK - Monocotyledons

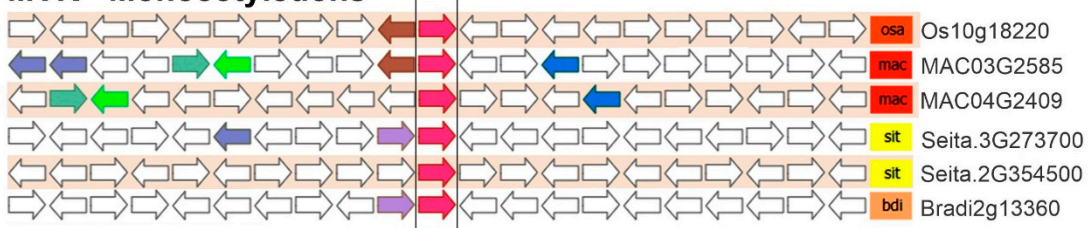

### DXR - Eudicotyledons

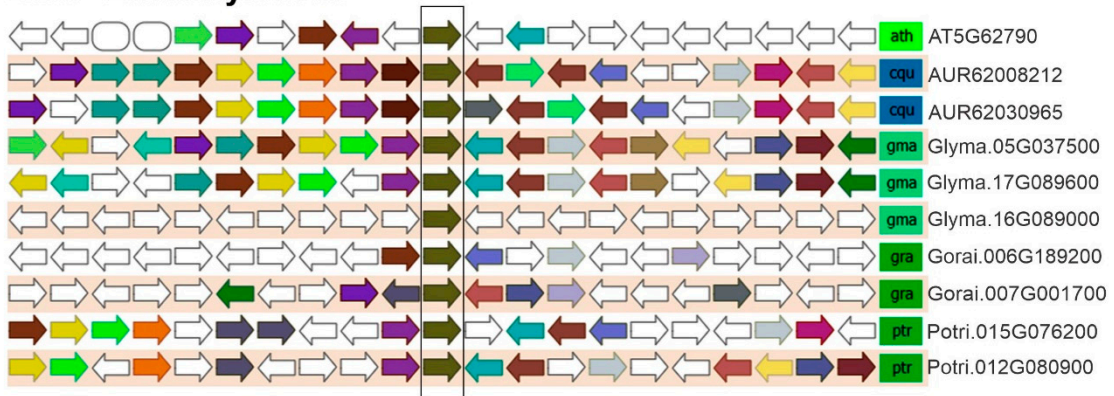

### DXR - Monocotyledons

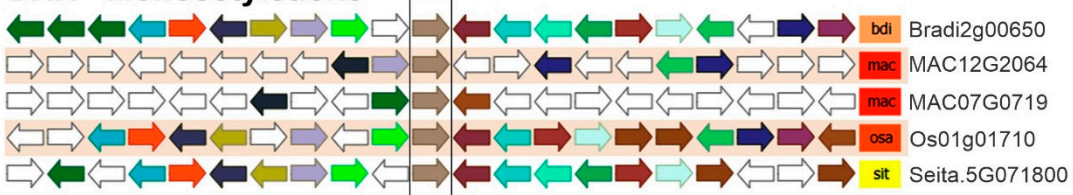

**Supplementary Figure 1.** Schematic representation of genomic regions containing *MVK* or *DXR* genes. We highlighted in a rectangle *DXR* and *MVK*. The figure was based on the “Synteny plot” tool of Plaza 4.0. Genes with the same color have similar function. Eudicot *MVK* genes share

similar genomic neighborhood. We circled the *MVK* tandem duplication in *P. trichocarpa*. In monocots, genomic neighborhood among *MVK* genes has less collinear genes. In *DXR*, we also observe high similar genomic neighborhood, suggesting WGD events in soybean (*Glyma*) and *P. trichocarpa* (*Potri*). Only one gene in soybean (*Glyma.16G089000*) and one in cotton (*Gorai.006G189200*) do not share a significative genomic neighborhood, suggesting that these genes arose from segmental duplication.

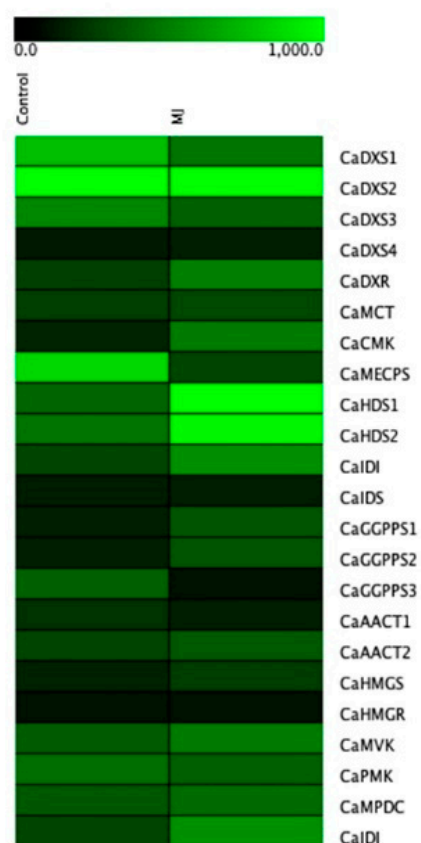

**Supplementary Figure 2.** RPKM values of *C. arabica* terpenoid pathway genes under methyl jasmonate application. Legend: C – control; MJ – methyl jasmonate application.

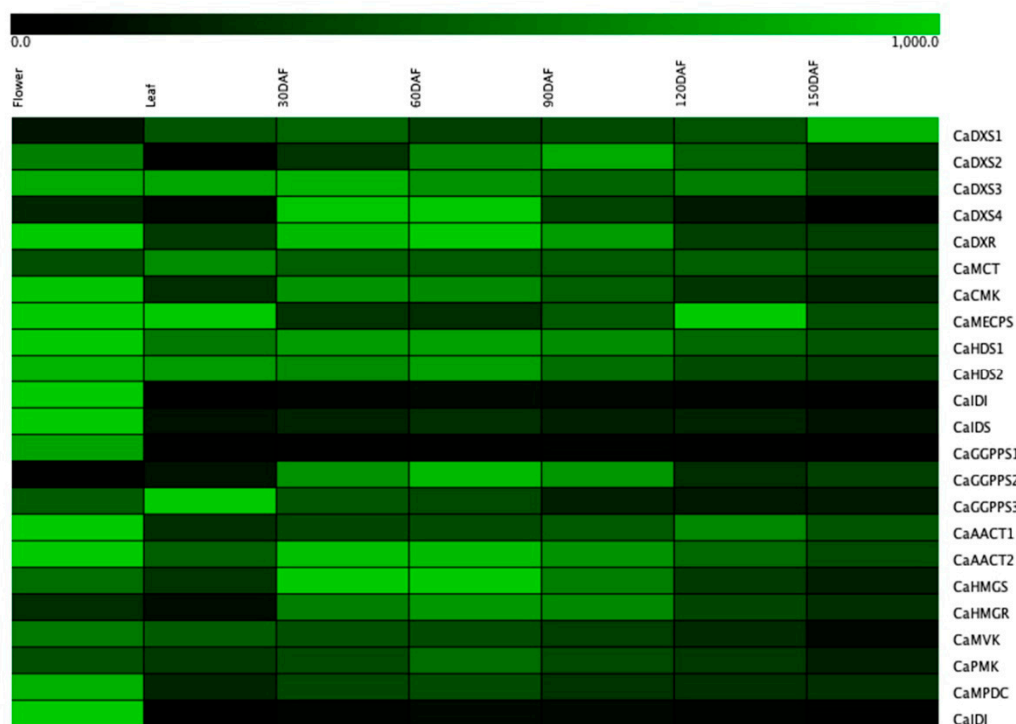

**Supplementary Figure 3.** RPKM values of *C. arabica* terpenoid pathway genes in flowers, leaves and along fruit development. Legend: DAF – perisperm in days after flowering.

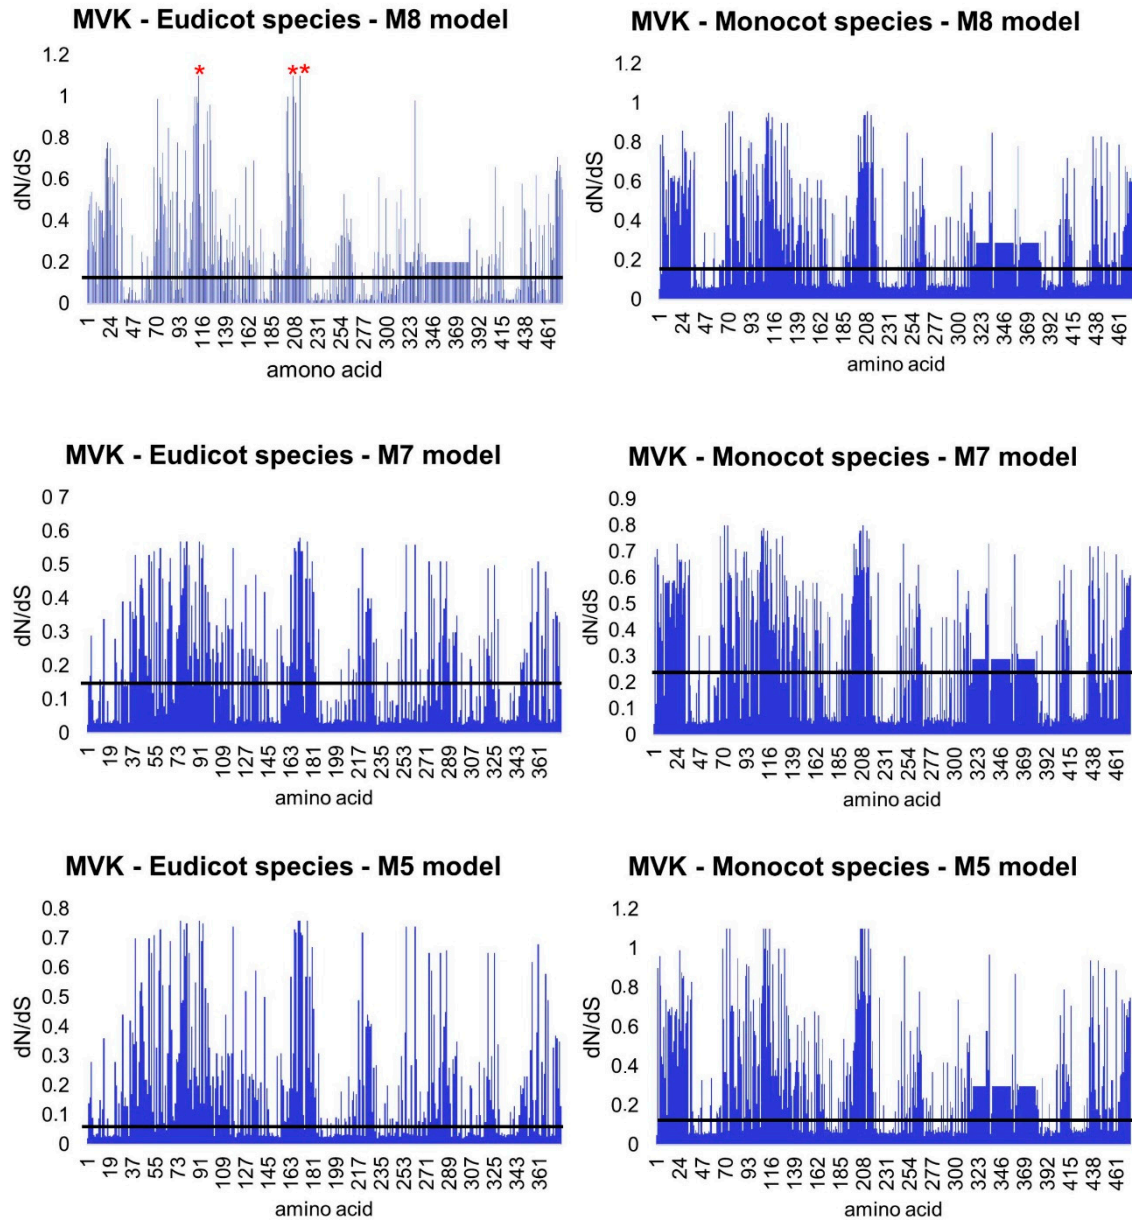

**Supplementary Figure 4.** Distribution of dN/dS over individual sites in MVK, based on Selecton statistics. The horizontal line represents the average dN/dS. Asterisks (\*) represent statistical significance in Bayesian analysis ( $p < 0.05$ ).



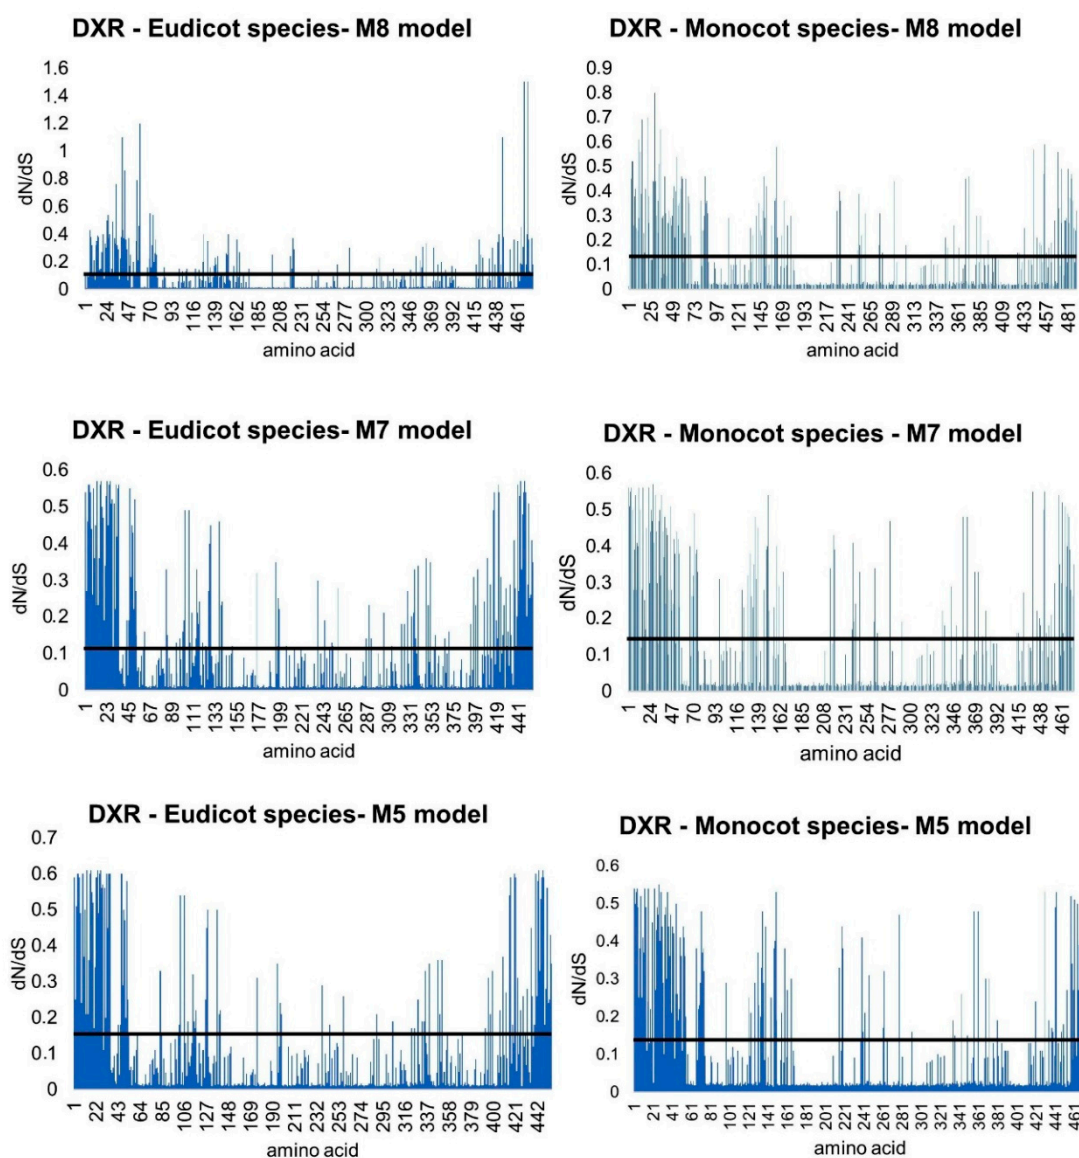

**Supplementary Figure 5.** Distribution of dN/dS over individual sites in *DXR*, based on Selecton statistics. The horizontal line represents the average dN/dS.
